# Supplementary material for: Hydrophilic Chlorin e6-Poly(amidoamine) Dendrimer Nanoconjugates for Enhanced Photodynamic Therapy
Source: PubMed Central journal article supplement (PMC6027052; doi:10.3390/nano8060445), 2018-06-18
Supplement: nanomaterials-08-00445-s001.pdf [file nanomaterials-08-00445-s001.pdf]

## Supporting Information

### Hydrophilic Chlorin e6-Poly(amidoamine) Dendrimer Nanoconjugates for Enhanced Photodynamic Therapy

So-Ri Lee and Young-Jin Kim\*

Department of Biomedical Engineering, Daegu Catholic University, Gyeongsan 38430, Republic of Korea; esdkiss@naver.com (S.-R.L.); yjkim@cu.ac.kr (Y.-J.K.)

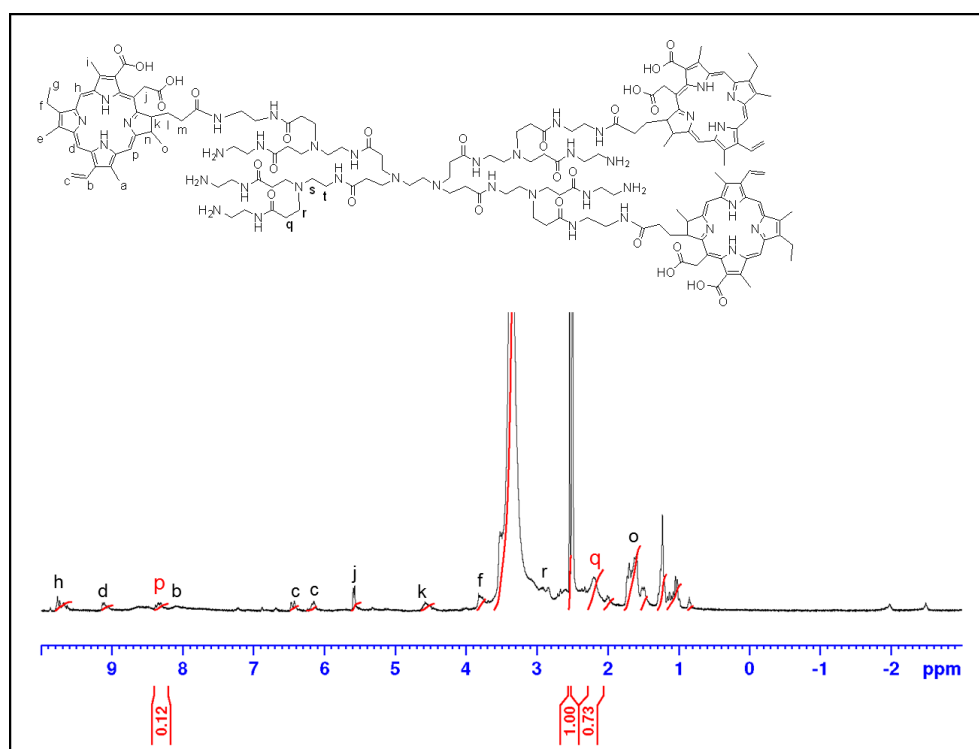

Figure S1. <sup>1</sup>H NMR spectrum of DC.
